# Supplementary material for: Retinal Detachment in Type IX collagen recessive Stickler syndrome
Source: Research Square preprint supplement (doi:10.21203/rs.3.rs-3894285/v1), 2024-03-26
Supplement: Supplementary file 1 [file cc52caa6dae7e729c501583f.xlsx]

## Sheet: Sheet1
Table 1: Key clinical findings
Number	Age	Gene	Variant	Consanguinity? (Y=Yes; N=No)	Refraction: RE/LE (D)	Retina	Vitreous	Face	Palate	Hearing	Joints	XR
1-I	12	COL9A1	c. 1519C>T, p.(Arg507Ter)	Y (first cousins)	-8.5/-7	Normal	Hypoplastic	Normal	Normal	SNHL	No symptoms	Normal
2-I	20	COL9A1	c.1970delC, p.(Pro657fs) Concurrent ARID1B variant	N	-2/-4	RE: Peripapillary Atrophy, Dysplastic optic disk; LE: Peripapillary Atrophy	Normal	Normal	High arched	Severe mixed conductive/ SNHL	No symptoms	Normal
3-I	7	COL9A2	c98delG, p.(Gly33AlafsTer53)	Y (first cousins)	-9/-9	Normal	Hypoplastic	Flat midface	Normal	HFSNHL	No symptoms	Normal
4-I	20	COL9A2	c. 1692_1717del p.(Gly565TrpfsTer32)	Y (first cousins)	-6.5/-7	Bilateral snail track degeneration, flat round holes	Hypoplastic	Normal	Normal	SNHL	Generalised pain - erythromelalgia	Normal
4-II	14	COL9A2	c. 1692_1717del p.(Gly565TrpfsTer32)	Y (first cousins)	-4/-2.25	Bilateral lattice degeneration	Hypoplastic	Normal	Normal	SNHL	Pain in legs	Refused
5-I	8	COL9A2	Compound heterozygous: c.1792+5G>A ; c.1918C>T p.(Arg640Ter)	N	-4.5/-5	Normal	Hypoplastic	Flat midface	Normal	SNHL	No symptoms	Normal
6-I	7	COL9A2	c.[75+2dup];[75+2dup]	Y (first cousins)	-12.5/-12.75	Normal	Hypoplastic	Normal	High arched	SNHL	Features of Juvenile Idiopathic Arthritis (JIA) & Perthes	Features consistent with JIA, spondyloepiphyseal dysplasia
7-I	42	COL9A3	c.107_116del10, p.(Pro36fs) Concurrent COL2A1 AD Stickler	N	-15/-13	RE: ERM peel age 31; LE temporal chorioretinal peripheral atrophic areas temporally, intraretinal cystic change	Hypoplastic	Normal	Normal	Asymptomatic; No audiometry	No symptoms	Not commented
8-I	28	COL9A3	c. 1411C>T, p. Arg471Ter	Y (first cousins)	-23/-23	Highly myopic appearance	Hypoplastic	Normal	Normal	HFSNHL	Severe arthropathy in shoulders and hip, requires wheelchair	Bones osteopenic, spinal scoliosis surgery, joint space narrowing in both knees
8-II	25	COL9A3	c. 1411C>T, p. Arg471Ter	Y (first cousins)	-7/-7	LE: previous retinal detachment age 24 [horseshoe tear, subsequent recurrent subtotal RD]; RE: normal	Hypoplastic	Normal	Normal	HFSNHL	No symptoms	Mild scoliosis, otherwise normal
9-I	42	COL9A3	c. 1477G>A, p.(Gly493Arg)	N	-4/-6	LE: previous retinal detachment age 36 (macula-off rhegmatogenous RD, no complications), atrophic patch superior to retina; RE: normal	Hypoplastic	Normal	Normal	Normal on audiometry	No symptoms	Features of possible collangenopathy
10-I	7	COL9A3	Compound heterozygous: c.1740delT (p.Gly581Aspfs*92) ; c.1933G>A (p.Gly645Arg)	N	-6.5/-6	Normal	Hypoplastic	Flat midface	Normal	SNHL	No symptoms	Normal
11-I	3	COL9A3	c. 1548G>A p.(Pro516Pro)	N	-10/-10	Highly myopic appearance	Hypoplastic	Flat nasal bridge	Normal	SNHL	No symptoms	Normal
SUMMARY				Consanguinity: 7/13; 53.8%	High myopia (>-6): 10/13; 77%	Retinal Detachment: 2/13; 15.4%	Hypoplastic vitreous: 12/13; 92.3%	Midfacial hypoplasia: 4/13; 30.8%		Confirmed hearing problems in 11/12; 91.7%	Skeletal issues: 4/13; 30.8%
